# Supplementary material for: Cardiac Transcriptomics Reveals That MAPK Pathway Plays an Important Role in Hypoxia Tolerance in Bighead Carp (Hypophthalmichthys nobilis)
Source: MDPI journal article supplement (doi:10.3390/ani10091483), 2020-08-24
Supplement: s1 [file s1]

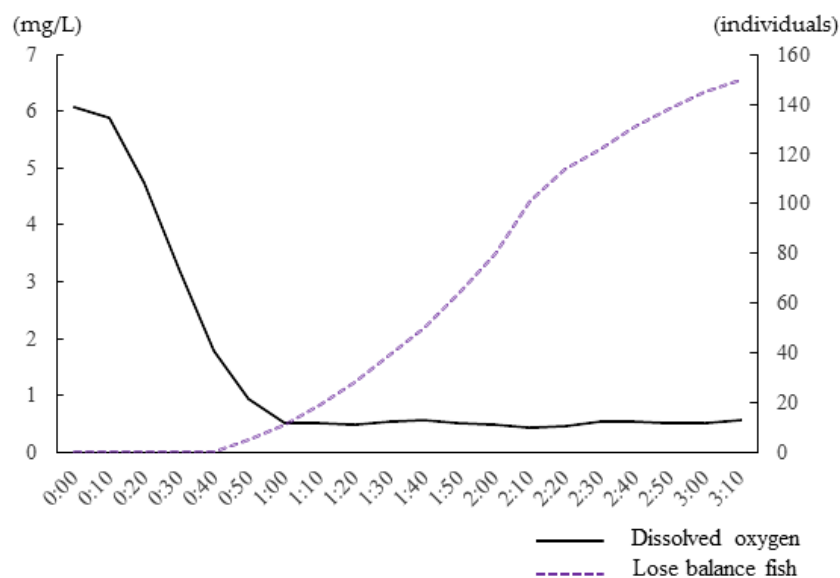

**Figure S1.** The information of decrease of DO and the number of loss balance fish with time.

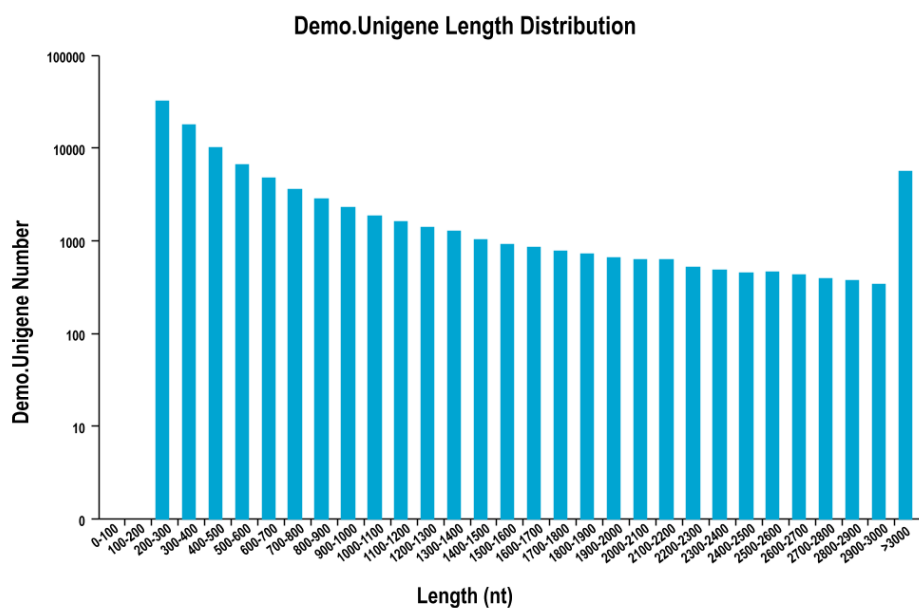

**Figure S2** Length distribution of the unigenes from heart transcriptomes of bighead carp under hypoxia stress.

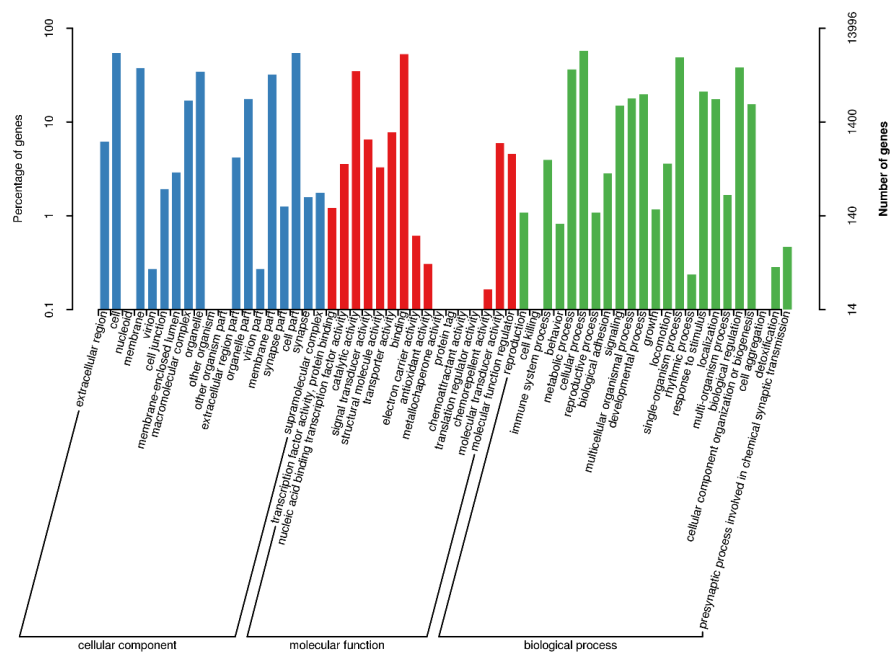

(a)

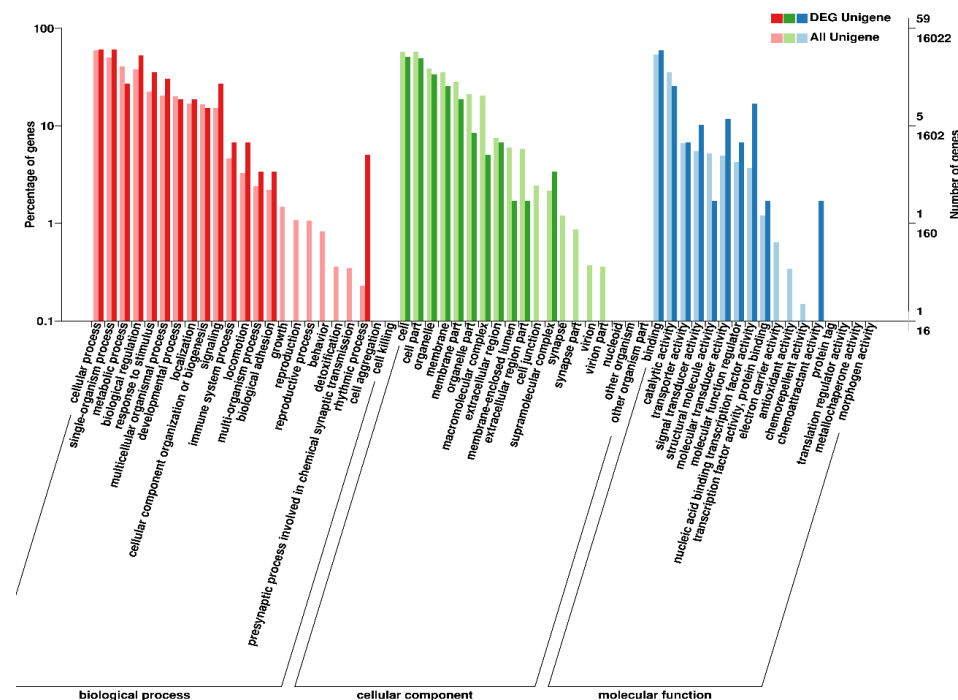

(b)

**Figure S3.** (a). Gene ontology classification of all unigenes in heart transcriptomes of bighead carp under hypoxia stress; (b). Gene ontology classification of the DEGs from NC vs HS group of transcriptomes of bighead carp under hypoxia stress.

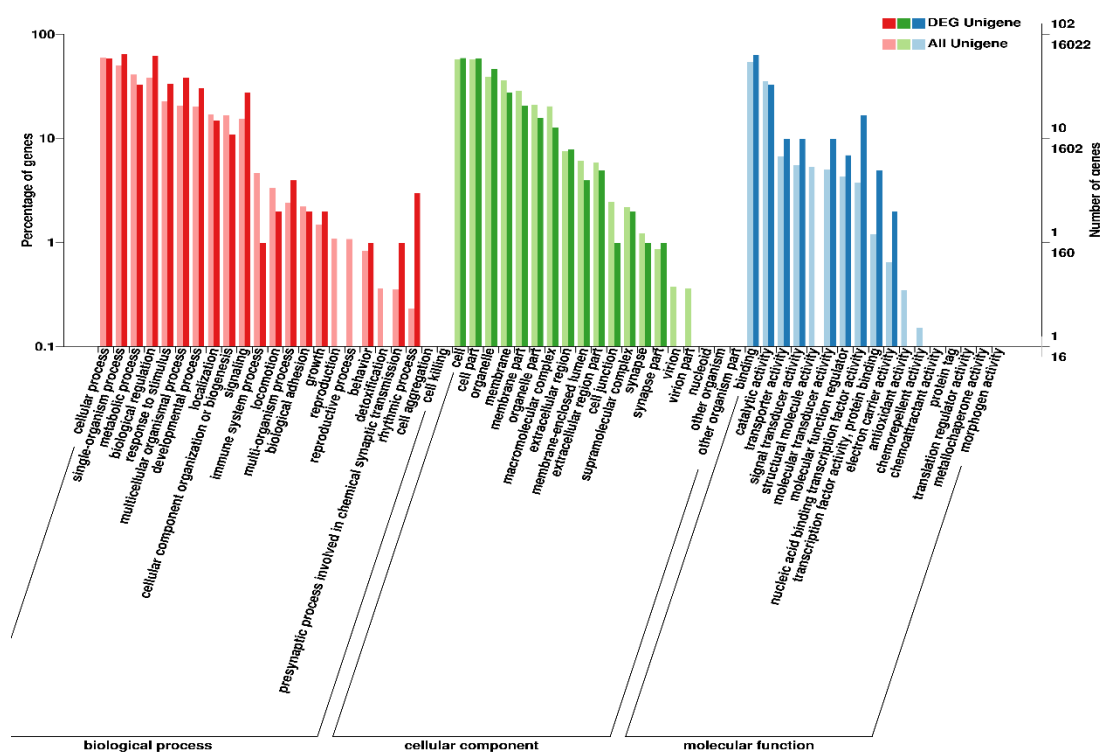

**Figure S4.** Gene ontology classification of the DEGs from NC vs HT group of transcriptomes of bighead carp under hypoxia stress.

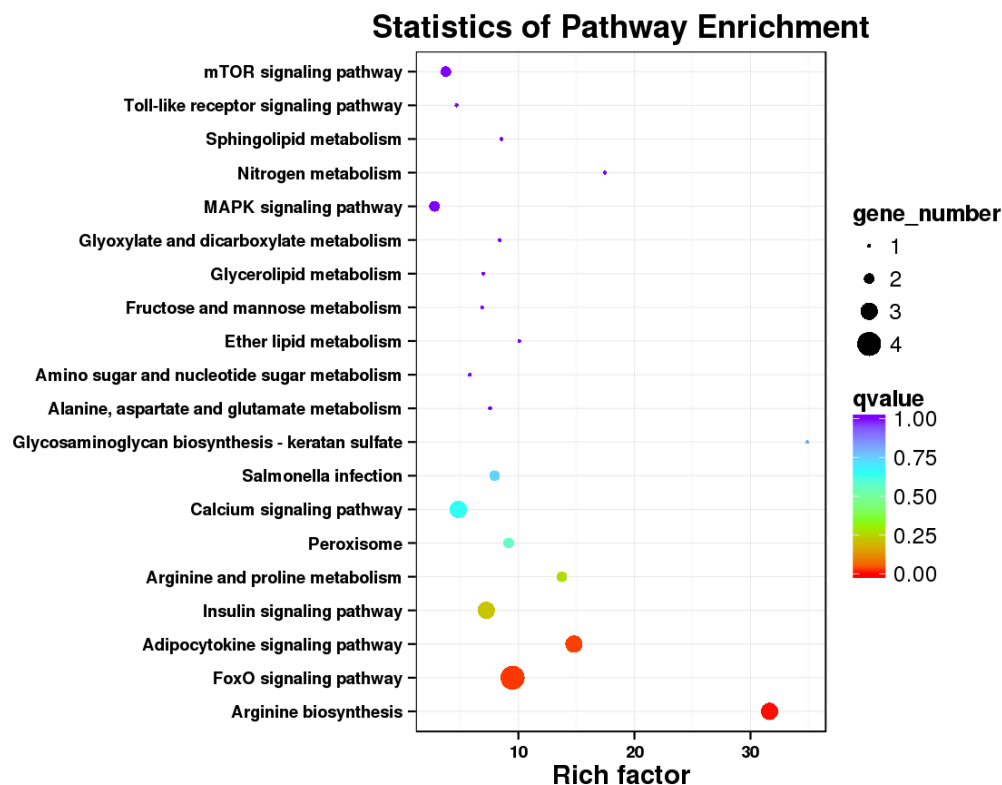

**Figure S5.** KEGG pathway enrichment of the DEGs from NC and HS groups of transcriptomes of bighead carp under hypoxia stress.

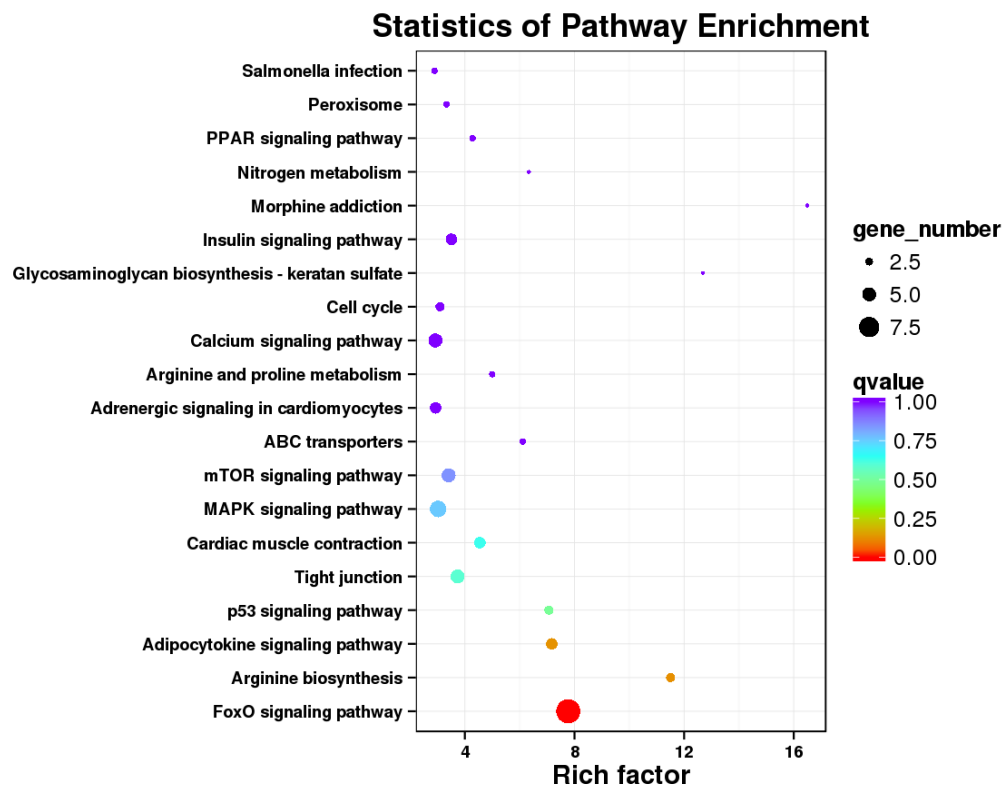

**Figure S6.** KEGG pathway enrichment of DEGs from NC and HT group of transcriptomes of bighead carp under hypoxia stress.

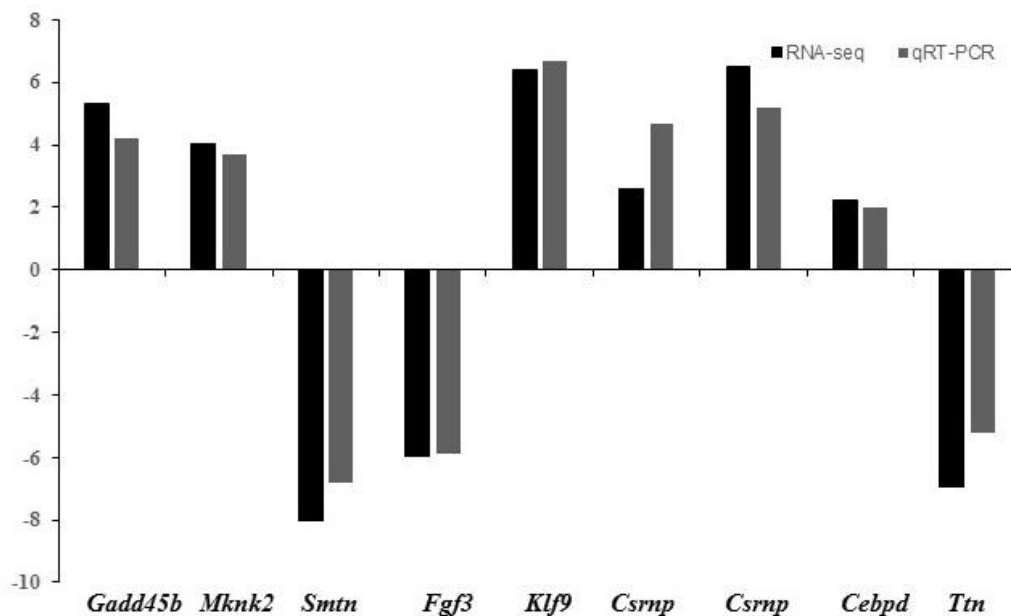

**Figure S7.** Illustration of qRT-PCR confirmation results for 9 randomly selected DEGs from the heart transcriptome of bighead carp under hypoxia stress. Gene expression levels are expressed as mean normalized ratios ( $n = 3, \pm SE$ ).  $\beta$ -Actin is used as a reference gene.

**Table S1.** Sequence statistics for individual paired-end reads from RNA-Seq libraries of bighead carp.

| Samples | Clean reads | Q30    | GC content | Mapped reads | Mapped ratio |
|---------|-------------|--------|------------|--------------|--------------|
| HS1     | 27,118,672  | 95.07% | 46.31%     | 22,426,752   | 82.70%       |
| HS2     | 30,586,580  | 95.27% | 46.41%     | 25,140,568   | 82.19%       |
| HS3     | 29,372,299  | 95.09% | 46.91%     | 23,745,084   | 80.84%       |
| HT2     | 24,517,927  | 95.14% | 46.77%     | 20,250,040   | 82.59%       |
| HT2     | 21,941,179  | 93.96% | 44.75%     | 18,204,812   | 82.97%       |
| HT3     | 23,433,598  | 94.96% | 46.07%     | 19,428,720   | 82.91%       |
| HC1     | 31,345,416  | 95.17% | 46.93%     | 25,874,293   | 82.55%       |
| HC2     | 21,088,217  | 94.81% | 44.72%     | 17,567,178   | 83.30%       |
| HC3     | 23,534,816  | 95.03% | 46.62%     | 19,298,044   | 82.00%       |

**Table S2.** Length distribution of the assembled transcriptomic contigs in bighead carp under hypoxia stress.

| Length (bp)  | Total Number of Unigenes | Percentage of Unigenes | Total Number of Transcripts | Percentage of Transcripts |
|--------------|--------------------------|------------------------|-----------------------------|---------------------------|
| 200-300      | 31790                    | 31.53%                 | 36702                       | 17.73%                    |
| 300-500      | 27816                    | 27.59%                 | 37161                       | 17.95%                    |
| 500-1000     | 19960                    | 19.80%                 | 40266                       | 19.45%                    |
| 1000-2000    | 11009                    | 10.92%                 | 41885                       | 20.24%                    |
| 2000+        | 10240                    | 10.16%                 | 50952                       | 24.62%                    |
| Total Number | 100817                   |                        | 206970                      |                           |
| Total Length | 85734049                 |                        | 303781753                   |                           |
| N50 Length   | 1633                     |                        | 2675                        |                           |
| Mean Length  | 850.392781               |                        | 1467.757419                 |                           |

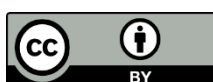

© 2019 by the authors. Licensee MDPI, Basel, Switzerland. This article is an open access article distributed under the terms and conditions of the Creative Commons Attribution (CC BY) license (<http://creativecommons.org/licenses/by/4.0/>).
